# Supplementary material
Source: Springer Nature journal article supplement (https://www.springermedizin.de/resource/supplementary/12889_2011_3822_MOESM2_ESM.pdf/9492524)

**R<sup>2</sup> for  
SCL-5**

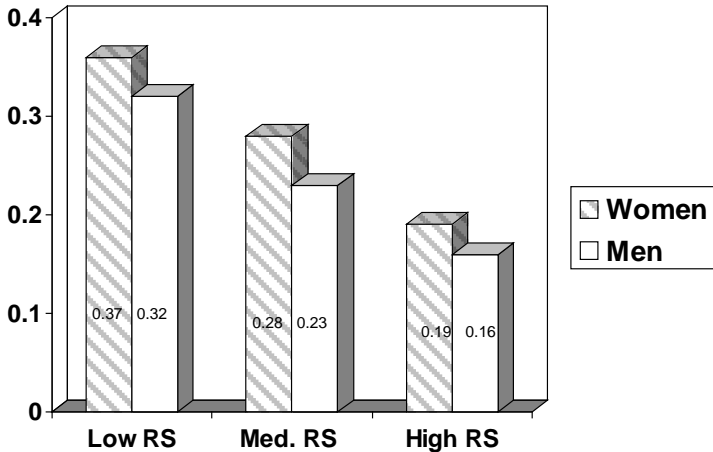

Supplement: MOESM2 [file 9492524]
